# Supplementary material for: The SnO2/MXene Composite Ethanol Sensor Based on MEMS Platform
Source: MDPI journal article supplement (doi:10.3390/chemosensors10030109), 2022-03-11
Supplement: s1 [file s1]

## Supplementary Materials

The following is the manufacturing process of the device. The flow chart is shown in Figure S1.

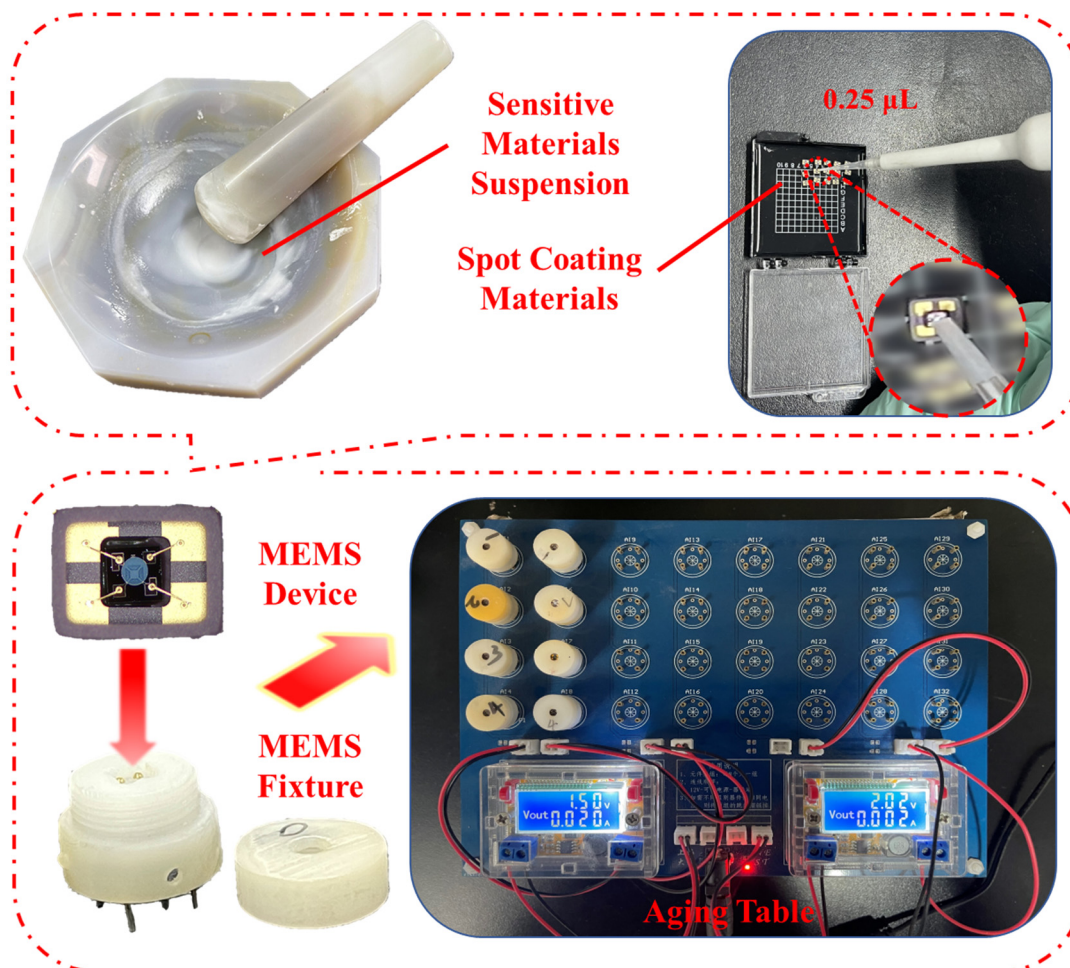

**Figure S1.** MEMS gas sensor preparation flow chart

Firstly, 50 mg of sensing material and 0.5 mL ethanol were put into a mortar, and ground them for 10 min. Then another 0.5 mL ethanol was dropped into the mortar and continuously ground for 10 min so as to obtain a suspension with uniform components.

In order to ensure the consistency of the prepared devices, five 0.25 µL suspension with a pipette gun was dropped onto the electrode of MEMS devices. The coated MEMS sensors were dried under the infrared lamp for 6 h, then put them into a fixture and aged on the fixture for 7 days before testing.

$P/P_0$  is the relative pressure,  $V_m$  is the saturated adsorption capacity of the single layer, and  $N_A$  is the Avogadro constant ( $6.023 \times 10^{23}$  /mol),  $\sigma_m$  is the area of each nitrogen molecule on the adsorbent surface ( $16.2 \times 10^{-20}$  m<sup>2</sup>),  $C$  is a constant,  $Q$  is the adsorption capacity under the current relative pressure.

According to the multi-layer adsorption theory proposed by Brumauer, Emmett and Teller, the equation is obtained:

$$\frac{P}{Q(P_0 - P)} = \frac{1}{C} + \frac{C - 1}{V_m C} * \frac{P}{P_0} \quad (1)$$

When  $P/P_0$  is in the range of 0.05-0.25, a straight line between  $P/P_0$  and  $Q$  can be obtained, with slope  $\frac{1}{V_m}$  and intercept  $\frac{C-1}{V_m C}$ . The calculation formula of SSA is as follows:

$$SSA = V_m * N_A * \sigma_m \quad (2)$$

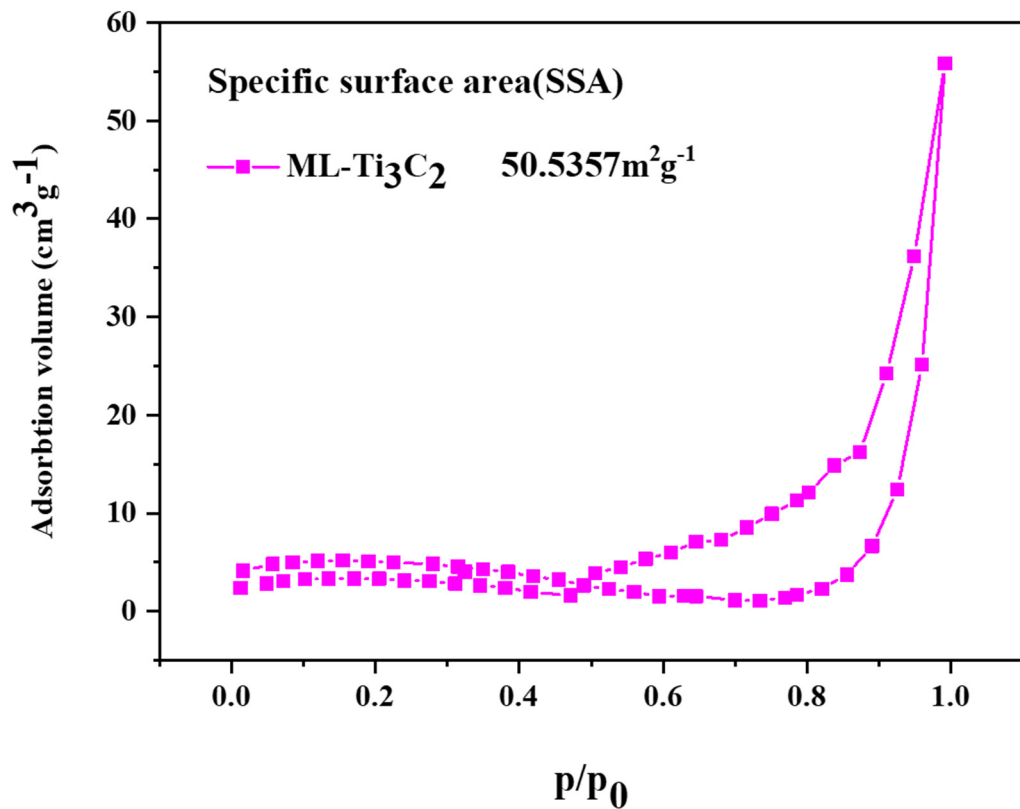

**Figure S2.** Nitrogen adsorption desorption isotherms of ML-Ti<sub>3</sub>C<sub>2</sub>T<sub>x</sub>
